# Supplementary material for: A phase 2 study of the first imipridone ONC201, a selective DRD2 antagonist for oncology, administered every three weeks in recurrent glioblastoma
Source: PubMed Central journal article supplement (PMC5668041; doi:10.18632/oncotarget.17837), 2017-05-12
Supplement: oncotarget-08-79298-s001.pdf [file oncotarget-08-79298-s001.pdf]

## A phase 2 study of the first imipridone **ONC201**, a selective DRD2 antagonist for oncology, administered every three weeks in recurrent glioblastoma

### Supplementary Material

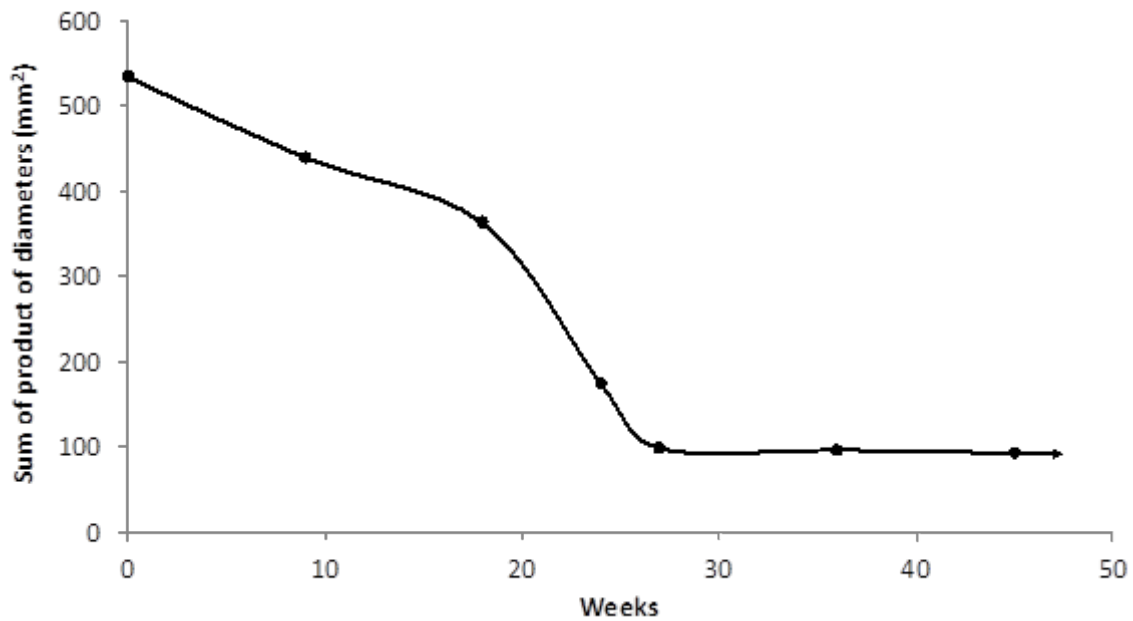

Supplemental Figure 1: Sum of product of diameters of two lesions in patient with objective response by RANO criteria after initiation of ONC201 treatment.

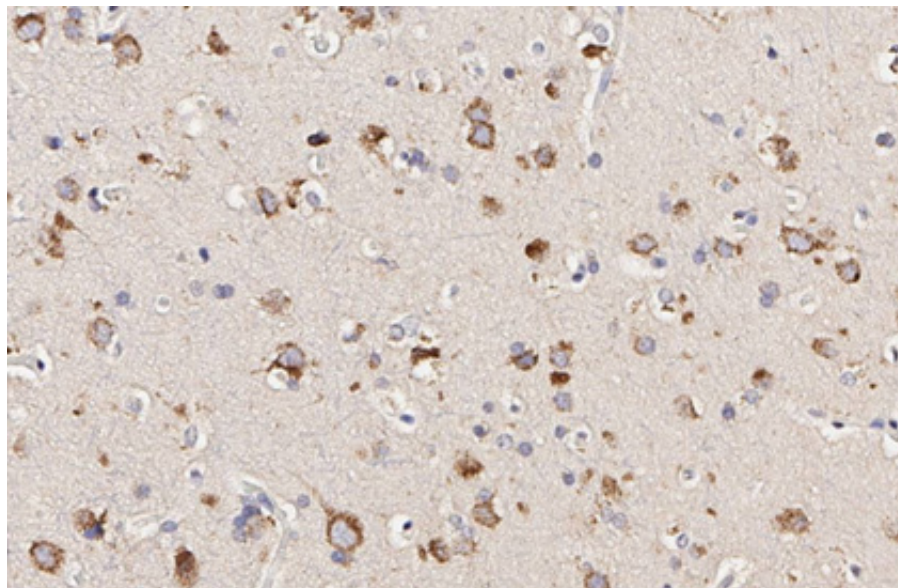

Supplemental Figure 2: DRD2 expression in archival tumor specimen. Exemplary image for DRD2 expression assayed by immunohistochemistry.
